# Supplementary material for: Evaluating the Representation of Community Colleges in Biology Education Research Publications following a Call to Action
Source: Atypon-hosted journal article supplement (doi:10.1187/cbe.21-09-0249), 2022-09-16
Supplement: combinedsupmats.pdf [file combinedsupmats.pdf]

# Supplemental Material

*CBE—Life Sciences Education*

Creech *et al.*

## **Supplemental Materials**

Evaluating the Representation of Community Colleges in Biology Education Research Publications Following a Call to Action.

### **Contents:**

Supplemental Table 1: Definitions of categories used in characterizing CC BER papers

Supplemental Table 2: List of the 147 CC BER published between 2016-2020 in the seven journals surveyed

Supplemental Table 3: CC BER paper type categories between 2016-2020

Supplemental Table 4: CC BER paper topic categories between 2016-2020

**Supplemental Table 1:  
Definitions of Article Type Categories Used in Characterizing CC BER Papers**

| <b>Article Type</b>    | <b>Definition</b>                                                                                                                                                                            |
|------------------------|----------------------------------------------------------------------------------------------------------------------------------------------------------------------------------------------|
| Research Articles      | Papers that include original data collected by the authors and novel data analysis (CBE-LSE, 2022)                                                                                           |
| Teaching Tips          | Papers that contain new teaching techniques or pedagogical recommendations for practitioners without an assessment of the practices described (Schinske et al., 2017)                        |
| Essays                 | Papers that describe a problem or approach of general interest to the author(s), may include a review of the work of many individuals but do not contain novel data analysis (CBE-LSE, 2022) |
| Case Studies           | Papers that describe new case studies and how to effectively implement them (Schinske et al., 2017)                                                                                          |
| Review Articles        | Papers that summarize current understanding based on previously published studies, but do not contain novel data analysis (Schinske et al., 2017)                                            |
| Letters to the Editors | Papers that are directly responsive to an article published in the journal and intended to start dialog (CBE-LSE, 2022)                                                                      |
| Editorials             | Papers that act as position pieces to discuss topics of interest to the community but do not contain novel data analysis (Schinske et al., 2017)                                             |

**Supplemental Table 2:  
List of 147 CC BER Papers Published Between 2016-2020 in the Seven Journals Surveyed**

| <b>Journal</b>                   | <b>Year</b> | <b>Article Citation</b>                                                                                                                                                                                                                                                                                                                                  | <b>Number of Authors</b> | <b>Number of Community College-affiliated Authors</b> | <b>Main Article Topic</b> | <b>Article Type</b> |
|----------------------------------|-------------|----------------------------------------------------------------------------------------------------------------------------------------------------------------------------------------------------------------------------------------------------------------------------------------------------------------------------------------------------------|--------------------------|-------------------------------------------------------|---------------------------|---------------------|
| Advances in Physiology Education | 2016        | McFarland, J., Wenderoth, M. P., Michael, J., Cliff, W., Wright, A., & Modell, H. (2016). A conceptual framework for homeostasis: Development and validation. <i>Advances in Physiology Education</i> , 40(2), 213–222. <a href="https://doi.org/10.1152/advan.00103.2015">https://doi.org/10.1152/advan.00103.2015</a>                                  | 6                        | 1                                                     | Curricula and Teaching    | Essay               |
| Advances in Physiology Education | 2016        | McFarland, J., & Pape-Lindstrom, P. (2016). The pipeline of physiology courses in community colleges: To university, medical school, and beyond. <i>Advances in Physiology Education</i> , 40(4), 473–476. <a href="https://doi.org/10.1152/advan.00141.2016">https://doi.org/10.1152/advan.00141.2016</a>                                               | 2                        | 2                                                     | Degrees and Transfer      | Research Article    |
| Advances in Physiology Education | 2017        | Michael, J., Martinkova, P., McFarland, J., Wright, A., Cliff, W., Modell, H., & Wenderoth, M. P. (2017). Validating a conceptual framework for the core concept of “cell-cell communication.” <i>Advances in Physiology Education</i> , 41(2), 260–265. <a href="https://doi.org/10.1152/advan.00100.2016">https://doi.org/10.1152/advan.00100.2016</a> | 7                        | 1                                                     | Other                     | Essay               |
| Advances in Physiology Education | 2020        | Crowther, G. J., Wessels, J., Lesser, L. M., & Breckler, J. L. (2020). Is memorization the name of the game? Undergraduates’ perceptions of the usefulness of physiology songs. <i>Advances in Physiology Education</i> , 44(1), 104–112. <a href="https://doi.org/10.1152/advan.00112.2019">https://doi.org/10.1152/advan.00112.2019</a>                | 4                        | 1                                                     | Degrees and Transfer      | Essay               |
| Advances in Physiology Education | 2020        | Hillyer, J. M., & Gordon, K. A. (2020). Connecting anatomy and physiology concepts in an interdisciplinary high-fidelity patient simulation with undergraduate nursing and allied                                                                                                                                                                        | 2                        | 2                                                     | Degrees and Transfer      | Research Article    |

|                                  |      |                                                                                                                                                                                                                                                                                                                                                                                                                       |   |   |                        |                  |
|----------------------------------|------|-----------------------------------------------------------------------------------------------------------------------------------------------------------------------------------------------------------------------------------------------------------------------------------------------------------------------------------------------------------------------------------------------------------------------|---|---|------------------------|------------------|
|                                  |      | health students. <i>Advances in Physiology Education</i> , 44(1), 113–118. <a href="https://doi.org/10.1152/advan.00212.2018">https://doi.org/10.1152/advan.00212.2018</a>                                                                                                                                                                                                                                            |   |   |                        |                  |
| Advances in Physiology Education | 2020 | Judge, J. L., Cazares, V. A., Thompson, Z., & Skidmore, L. A. (2020). Development of low-cost cardiac and skeletal muscle laboratory activities to teach physiology concepts and the scientific method. <i>Advances in Physiology Education</i> , 44(2), 181–187. <a href="https://doi.org/10.1152/advan.00149.2019">https://doi.org/10.1152/advan.00149.2019</a>                                                     | 4 | 1 | Curricula and Teaching | Research Article |
| Advances in Physiology Education | 2020 | McFarland, J. L., & Michael, J. A. (2020). Reflections on core concepts for undergraduate physiology programs. <i>Advances in Physiology Education</i> , 44(4), 626–631. <a href="https://doi.org/10.1152/advan.00188.2019">https://doi.org/10.1152/advan.00188.2019</a>                                                                                                                                              | 2 | 1 | Curricula and Teaching | Essay            |
| Advances in Physiology Education | 2020 | Rogers, J., McFarland, J. L., Stanescu, C. I., Crosswhite, P. L., & Crecelius, A. R. (2020). The 2019 P-MIG Student Survey report and capturing the undergraduate perspective of physiology programming. <i>Advances in Physiology Education</i> , 44(4), 684–696. <a href="https://doi.org/10.1152/advan.00189.2019">https://doi.org/10.1152/advan.00189.2019</a>                                                    | 5 | 1 | Degrees and Transfer   | Research Article |
| Advances in Physiology Education | 2020 | Aguilar-Roca, N., Anderson, L. C., Crecelius, A. R., French, M. B., Johnson, K. M. S., McFarland, J. L., Rogers, J., Stanescu, C. I., & Wehrwein, E. A. (2020). Where do we go from here: A forward-thinking vision for physiology undergraduate education. <i>Advances in Physiology Education</i> , 44(4), 702–705. <a href="https://doi.org/10.1152/advan.00190.2019">https://doi.org/10.1152/advan.00190.2019</a> | 9 | 1 | Curricula and Teaching | Essay            |
| Advances in Physiology Education | 2020 | Michael, J., & McFarland, J. (2020). Another look at the core concepts of physiology: Revisions and resources. <i>Advances in Physiology Education</i> , 44(4), 752–762. <a href="https://doi.org/10.1152/advan.00114.2020">https://doi.org/10.1152/advan.00114.2020</a>                                                                                                                                              | 2 | 1 | Curricula and Teaching | Essay            |
| The American Biology Teacher     | 2016 | Wollert, D. A. (2016). Integrating fossils, natural selection & molecular genetics: A structured inquiry-based evolution lab. <i>The American Biology Teacher</i> , 78(2), 155–162. <a href="https://doi.org/10.1525/abt.2016.78.2.155">https://doi.org/10.1525/abt.2016.78.2.155</a>                                                                                                                                 | 1 | 1 | Curricula and Teaching | Research Article |

|                              |      |                                                                                                                                                                                                                                                                                                                                                                                            |    |   |                        |                  |
|------------------------------|------|--------------------------------------------------------------------------------------------------------------------------------------------------------------------------------------------------------------------------------------------------------------------------------------------------------------------------------------------------------------------------------------------|----|---|------------------------|------------------|
| The American Biology Teacher | 2016 | Thoney, T. (2016). Analyzing the vocabulary demands of introductory college textbooks. <i>The American Biology Teacher</i> , 78(5), 389–395. <a href="https://doi.org/10.1525/abt.2016.78.5.389">https://doi.org/10.1525/abt.2016.78.5.389</a>                                                                                                                                             | 1  | 1 | Curricula and Teaching | Research Article |
| The American Biology Teacher | 2016 | Bryce, C. M., Baliga, V. B., De Nesnera, K. L., Fiack, D., Goetz, K., Tarjan, L. M., Wade, C. E., Yovovich, V., Baumgart, S., Bard, D. G., Ash, D., Parker, I. M., & Gilbert, G. S. (2016). Exploring models in the biology classroom. <i>The American Biology Teacher</i> , 78(1), 35–42. <a href="https://doi.org/10.1525/abt.2016.78.1.35">https://doi.org/10.1525/abt.2016.78.1.35</a> | 13 | 1 | Curricula and Teaching | Research Article |
| The American Biology Teacher | 2016 | Layton, S., & Belden, J. (2016). Engaging undergraduates in the scientific process: Exploring invertebrate endocrine disruption. <i>The American Biology Teacher</i> , 78(5), 410–416. <a href="https://doi.org/10.1525/abt.2016.78.5.410">https://doi.org/10.1525/abt.2016.78.5.410</a>                                                                                                   | 2  | 1 | Curricula and Teaching | Research Article |
| The American Biology Teacher | 2016 | Goedhart, C. M., & McLaughlin, J. S. (2016). Student scientists: Transforming the undergraduate biology lab into a research experience. <i>The American Biology Teacher</i> , 78(6), 502–508. <a href="https://doi.org/10.1525/abt.2016.78.6.502">https://doi.org/10.1525/abt.2016.78.6.502</a>                                                                                            | 2  | 1 | Curricula and Teaching | Research Article |
| The American Biology Teacher | 2016 | Suiter, S., Oakley, J., & Goodman, J. (2016). Prevalence of student dissection-choice policies in u. S. Schools. <i>The American Biology Teacher</i> , 78(7), 560–567. <a href="https://doi.org/10.1525/abt.2016.78.7.560">https://doi.org/10.1525/abt.2016.78.7.560</a>                                                                                                                   | 3  | 1 | Curricula and Teaching | Research Article |
| The American Biology Teacher | 2016 | Newman, L., Duffus, A. L. J., & Lee, C. (2016). Using the free program mega to build phylogenetic trees from molecular data. <i>The American Biology Teacher</i> , 78(7), 608–612. <a href="https://doi.org/10.1525/abt.2016.78.7.608">https://doi.org/10.1525/abt.2016.78.7.608</a>                                                                                                       | 3  | 2 | Other                  | Research Article |
| The American Biology Teacher | 2016 | Fisher, M. R. (2016). Wastewater treatment provides for authentic inquiry-based experiences in the lab and beyond. <i>The American Biology Teacher</i> , 78(9), 739–745. <a href="https://doi.org/10.1525/abt.2016.78.9.739">https://doi.org/10.1525/abt.2016.78.9.739</a>                                                                                                                 | 1  | 1 | Curricula and Teaching | Teaching Tip     |

|                              |      |                                                                                                                                                                                                                                                                                                                          |   |   |                        |                  |
|------------------------------|------|--------------------------------------------------------------------------------------------------------------------------------------------------------------------------------------------------------------------------------------------------------------------------------------------------------------------------|---|---|------------------------|------------------|
| The American Biology Teacher | 2017 | Advising biology majors about career choices: Resources & information for biology instructors. (2017). <i>The American Biology Teacher</i> , 79(1), 14–21. <a href="https://doi.org/10.1525/abt.2017.79.1.14">https://doi.org/10.1525/abt.2017.79.1.14</a>                                                               | 3 | 1 | Degrees and Transfer   | Research Article |
| The American Biology Teacher | 2017 | Greene, M., Pitts, W., & Dewprashad, B. (2017). Using videography to study the effects of stimulants on daphnia magna. <i>The American Biology Teacher</i> , 79(1), 35–40. <a href="https://doi.org/10.1525/abt.2017.79.1.35">https://doi.org/10.1525/abt.2017.79.1.35</a>                                               | 3 | 3 | Curricula and Teaching | Research Article |
| The American Biology Teacher | 2017 | Presley, M. L., Gehringer, R., & Hanuscin, D. L. (2017). Using natural selection concept inventories in college biology classrooms to improve teaching and learning. <i>The American Biology Teacher</i> , 79(2), 91–94. <a href="https://doi.org/10.1525/abt.2017.79.2.91">https://doi.org/10.1525/abt.2017.79.2.91</a> | 3 | 1 | Curricula and Teaching | Research Article |
| The American Biology Teacher | 2017 | Bauer, S. (2017). The impact of the chukwin mini-unit on students' understanding of natural selection. <i>The American Biology Teacher</i> , 79(2), 120–127. <a href="https://doi.org/10.1525/abt.2017.79.2.120">https://doi.org/10.1525/abt.2017.79.2.120</a>                                                           | 1 | 1 | Curricula and Teaching | Research Article |
| The American Biology Teacher | 2017 | Mulligan, E. A. (2017). Building zoob models to help students learn about nucleic acid structure and function. <i>The American Biology Teacher</i> , 79(4), 294–300. <a href="https://doi.org/10.1525/abt.2017.79.4.294">https://doi.org/10.1525/abt.2017.79.4.294</a>                                                   | 1 | 1 | Curricula and Teaching | Teaching Tip     |
| The American Biology Teacher | 2017 | Fisher, M. (2017). Letters to the editor. <i>The American Biology Teacher</i> , 79(4), 255–255. <a href="https://doi.org/10.1525/abt.2017.79.4.255a">https://doi.org/10.1525/abt.2017.79.4.255a</a>                                                                                                                      | 1 | 1 | Curricula and Teaching | Letter to Editor |
| The American Biology Teacher | 2017 | Fuller, K. (2017). Beyond reflection: Using eportfolios for formative assessment to improve student engagement in non-majors introductory science. <i>The American Biology Teacher</i> , 79(6), 442–449. <a href="https://doi.org/10.1525/abt.2017.79.6.442">https://doi.org/10.1525/abt.2017.79.6.442</a>               | 1 | 1 | Curricula and Teaching | Research Article |
| The American Biology Teacher | 2017 | Aguilera, A., Schreier, J., & Saitow, C. (2017). Using iterative group presentations in an introductory biology course to enhance student engagement and critical thinking.                                                                                                                                              | 3 | 1 | Curricula and Teaching | Research Article |

|                              |      |                                                                                                                                                                                                                                                                                                                                                                    |   |   |                        |                  |
|------------------------------|------|--------------------------------------------------------------------------------------------------------------------------------------------------------------------------------------------------------------------------------------------------------------------------------------------------------------------------------------------------------------------|---|---|------------------------|------------------|
|                              |      | The American Biology Teacher, 79(6), 450–454.<br><a href="https://doi.org/10.1525/abt.2017.79.6.450">https://doi.org/10.1525/abt.2017.79.6.450</a>                                                                                                                                                                                                                 |   |   |                        |                  |
| The American Biology Teacher | 2017 | Lupton, Q. (2017). Pokémon in the midst: Collecting and using data from within the Pokémon Go Ecosystem to facilitate ecology and Wildlife Biology Education. The American Biology Teacher, 79(7), 592–593.<br><a href="https://doi.org/10.1525/abt.2017.79.7.592">https://doi.org/10.1525/abt.2017.79.7.592</a>                                                   | 1 | 1 | Other                  | Essay            |
| The American Biology Teacher | 2017 | Bonney, K. M., & Nicholas, L. (2017). The mysterious murder of christa worthington. The American Biology Teacher, 79(9), 702–710.<br><a href="https://doi.org/10.1525/abt.2017.79.9.702">https://doi.org/10.1525/abt.2017.79.9.702</a>                                                                                                                             | 2 | 1 | Curricula and Teaching | Case Study       |
| The American Biology Teacher | 2018 | Berchiolli, B., Movahedzadeh, F., & Cherif, A. (2018). Assessing student success in a project-based learning biology course at a Community College. The American Biology Teacher, 80(1), 6–10. <a href="https://doi.org/10.1525/abt.2018.80.1.6">https://doi.org/10.1525/abt.2018.80.1.6</a>                                                                       | 3 | 2 | Curricula and Teaching | Research Article |
| The American Biology Teacher | 2018 | Fisher, M. R. (2018). Evaluation of cost savings and perceptions of an open textbook in a community college science course. The American Biology Teacher, 80(6), 410–415. <a href="https://doi.org/10.1525/abt.2018.80.6.410">https://doi.org/10.1525/abt.2018.80.6.410</a>                                                                                        | 1 | 1 | Curricula and Teaching | Research Article |
| The American Biology Teacher | 2018 | Goetze, J. R., & Rodriguez, M. (2018). A “sweet” activity to teach basic population estimation principles, community diversity assessment, and mathematical reasoning to biology students. The American Biology Teacher, 80(7), 522–528.<br><a href="https://doi.org/10.1525/abt.2018.80.7.522">https://doi.org/10.1525/abt.2018.80.7.522</a>                      | 2 | 2 | Curricula and Teaching | Teaching Tip     |
| The American Biology Teacher | 2018 | Williamson, J., & Lee, C. (2018). What’s behind that smile: Using analogies, facial expressions, and special senses to demonstrate the interactions between body systems in anatomy and physiology lab classes. The American Biology Teacher, 80(9), 661–667.<br><a href="https://doi.org/10.1525/abt.2018.80.9.661">https://doi.org/10.1525/abt.2018.80.9.661</a> | 2 | 2 | Curricula and Teaching | Teaching Tip     |



|                              |      |                                                                                                                                                                                                                                                                                                                |   |   |                        |                  |
|------------------------------|------|----------------------------------------------------------------------------------------------------------------------------------------------------------------------------------------------------------------------------------------------------------------------------------------------------------------|---|---|------------------------|------------------|
| The American Biology Teacher | 2019 | Duffus, A. L. J. (2019). An emerging amphibian infection as a model for teaching phylogenetic reconstruction. <i>The American Biology Teacher</i> , 81(1), 32–39. <a href="https://doi.org/10.1525/abt.2019.81.1.32">https://doi.org/10.1525/abt.2019.81.1.32</a>                                              | 1 | 1 | Curricula and Teaching | Teaching Tip     |
| The American Biology Teacher | 2019 | Liang, J., & Zaitsev, I. V. (2019). Chronic fatigue syndrome & other difficulties: Introducing a modern scientific controversy to a biology classroom. <i>The American Biology Teacher</i> , 81(6), 387–394. <a href="https://doi.org/10.1525/abt.2019.81.6.387">https://doi.org/10.1525/abt.2019.81.6.387</a> | 2 | 2 | Curricula and Teaching | Case Study       |
| The American Biology Teacher | 2019 | Karpakakunjaram, V., & Jenkins, K. (2019). “I was told there would be no math involved.” <i>The American Biology Teacher</i> , 81(7), 465–465. <a href="https://doi.org/10.1525/abt.2019.81.7.465">https://doi.org/10.1525/abt.2019.81.7.465</a>                                                               | 2 | 1 | Curricula and Teaching | Editorial        |
| The American Biology Teacher | 2020 | Gusky, S. B. (2020). Tackling old issues with new approaches. <i>The American Biology Teacher</i> , 82(1), 1–1. <a href="https://doi.org/10.1525/abt.2020.82.1.1">https://doi.org/10.1525/abt.2020.82.1.1</a>                                                                                                  | 1 | 1 | Curricula and Teaching | Essay            |
| The American Biology Teacher | 2020 | Wibking, K. (2020). Gas exchange gamified: Teaching respiration physiology with a novel board game. <i>The American Biology Teacher</i> , 82(3), 175–177. <a href="https://doi.org/10.1525/abt.2020.82.3.175">https://doi.org/10.1525/abt.2020.82.3.175</a>                                                    | 1 | 1 | Curricula and Teaching | Teaching Tip     |
| The American Biology Teacher | 2020 | Petersen, J., & Chan, P. (2020). A college–high school collaboration to support authentic microbiology research. <i>The American Biology Teacher</i> , 82(4), 201–208. <a href="https://doi.org/10.1525/abt.2020.82.4.201">https://doi.org/10.1525/abt.2020.82.4.201</a>                                       | 2 | 1 | Curricula and Teaching | Research Article |
| The American Biology Teacher | 2020 | Quiroz, T., & Tisdale, C. W. (2020). Committed citizens can change the world & help teach citizenship. <i>The American Biology Teacher</i> , 82(5), 277–277. <a href="https://doi.org/10.1525/abt.2020.82.5.277">https://doi.org/10.1525/abt.2020.82.5.277</a>                                                 | 2 | 2 | Other                  | Essay            |
| The American Biology Teacher | 2020 | Wollert, D. (2020). The fascinating & controversial new science of crispr. <i>The American Biology Teacher</i> , 82(5), 279–288. <a href="https://doi.org/10.1525/abt.2020.82.5.279">https://doi.org/10.1525/abt.2020.82.5.279</a>                                                                             | 1 | 1 | Other                  | Research Article |

|                               |      |                                                                                                                                                                                                                                                                                                                                                        |    |   |                        |                  |
|-------------------------------|------|--------------------------------------------------------------------------------------------------------------------------------------------------------------------------------------------------------------------------------------------------------------------------------------------------------------------------------------------------------|----|---|------------------------|------------------|
| The American Biology Teacher  | 2020 | Wollert, D. (2020). Wet & dry lab activities to introduce students to crispr-based gene editing. <i>The American Biology Teacher</i> , 82(5), 315–322. <a href="https://doi.org/10.1525/abt.2020.82.5.315">https://doi.org/10.1525/abt.2020.82.5.315</a>                                                                                               | 1  | 1 | Curricula and Teaching | Research Article |
| The American Biology Teacher  | 2020 | Pandemic lessons: Building empathy & community. (2020). <i>The American Biology Teacher</i> , 82(6), 369–369. <a href="https://doi.org/10.1525/abt.2020.82.6.369">https://doi.org/10.1525/abt.2020.82.6.369</a>                                                                                                                                        | 1  | 1 | Other                  | Editorial        |
| The American Biology Teacher  | 2020 | Wolf, A. (2020). A model curriculum for flipping an allied health microbiology course. <i>The American Biology Teacher</i> , 82(9), 633–637. <a href="https://doi.org/10.1525/abt.2020.82.9.633">https://doi.org/10.1525/abt.2020.82.9.633</a>                                                                                                         | 1  | 1 | Curricula and Teaching | Teaching Tip     |
| Anatomical Sciences Education | 2018 | Verenna, A. A., Noble, K. A., Pearson, H. E., & Miller, S. M. (2018). Role of comprehension on performance at higher levels of Bloom's taxonomy: Findings from assessments of healthcare professional students. <i>Anatomical sciences education</i> , 11(5), 433–444. <a href="https://doi.org/10.1002/ase.1768">https://doi.org/10.1002/ase.1768</a> | 4  | 1 | Curricula and Teaching | Research Article |
| BioScience                    | 2016 | Shortlidge, E. E., Bangera, G., & Brownell, S. E. (2016). Faculty perspectives on developing and teaching course-based undergraduate research experiences. <i>BioScience</i> , 66(1), 54–62. <a href="https://doi.org/10.1093/biosci/biv167">https://doi.org/10.1093/biosci/biv167</a>                                                                 | 3  | 1 | Curricula and Teaching | Research Article |
| CBE—Life Sciences Education   | 2016 | Kenyon, K. L., Onorato, M. E., Gottesman, A. J., Hoque, J., & Hoskins, S. G. (2016). Testing CREATE at community colleges: An examination of faculty perspectives and diverse student gains. <i>CBE—Life Sciences Education</i> , 15(1), ar8.                                                                                                          | 5  | 0 | Curricula and Teaching | Research Article |
| CBE—Life Sciences Education   | 2016 | Elgin, S. C., Bangera, G., Decatur, S. M., Dolan, E. L., Guertin, L., Newstetter, W. C., ... & Labov, J. B. (2016). Insights from a convocation: integrating discovery-based research into the undergraduate curriculum. <i>CBE—Life Sciences Education</i> , 15(2), fe2.                                                                              | 12 | 1 | Curricula and Teaching | Essay            |
| CBE—Life Sciences Education   | 2016 | Barnes, M. E., & Brownell, S. E. (2016). Practices and perspectives of college instructors on addressing religious                                                                                                                                                                                                                                     | 2  | 0 | Curricula and Teaching | Research Article |

|                             |      |                                                                                                                                                                                                                                                                         |   |   |                        |                  |
|-----------------------------|------|-------------------------------------------------------------------------------------------------------------------------------------------------------------------------------------------------------------------------------------------------------------------------|---|---|------------------------|------------------|
|                             |      | beliefs when teaching evolution. <i>CBE—Life Sciences Education</i> , 15(2), ar18.                                                                                                                                                                                      |   |   |                        |                  |
| CBE—Life Sciences Education | 2016 | Schinske, J. N., Perkins, H., Snyder, A., & Wyer, M. (2016). Scientist spotlight homework assignments shift students' stereotypes of scientists and enhance science identity in a diverse introductory science class. <i>CBE—Life Sciences Education</i> , 15(3), ar47. | 4 | 2 | Equity and Diversity   | Research Article |
| CBE—Life Sciences Education | 2016 | Morales, D. X., Grineski, S. E., & Collins, T. W. (2016). Influences on faculty willingness to mentor undergraduate students from another university as part of an interinstitutional research training program. <i>CBE—Life Sciences Education</i> , 15(3), ar35.      | 3 | 0 | Equity and Diversity   | Research Article |
| CBE—Life Sciences Education | 2016 | Prunuske, A., Wilson, J., Walls, M., Marrin, H., & Clarke, B. (2016). Efforts at broadening participation in the sciences: An examination of the mentoring experiences of students from underrepresented groups. <i>CBE—Life Sciences Education</i> , 15(3), ar26.      | 5 | 0 | Equity and Diversity   | Research Article |
| CBE—Life Sciences Education | 2016 | Remich, R., Naffziger-Hirsch, M. E., Gazley, J. L., & McGee, R. (2016). Scientific growth and identity development during a postbaccalaureate program: Results from a multisite qualitative study. <i>CBE—Life Sciences Education</i> , 15(3), ar25.                    | 4 | 1 | Degrees and Transfer   | Research Article |
| CBE—Life Sciences Education | 2016 | Varty, A. K. (2016). Options for online undergraduate courses in biology at American colleges and universities. <i>CBE—Life Sciences Education</i> , 15(4), ar58.                                                                                                       | 1 | 1 | Degrees and Transfer   | Research Article |
| CBE—Life Sciences Education | 2016 | Beck, C. W., & Blumer, L. S. (2016). Alternative realities: Faculty and student perceptions of instructional practices in laboratory courses. <i>CBE—Life Sciences Education</i> , 15(4), ar52.                                                                         | 2 | 0 | Curricula and Teaching | Research Article |

|                             |      |                                                                                                                                                                                                                                                                                                                                               |    |    |                        |                  |
|-----------------------------|------|-----------------------------------------------------------------------------------------------------------------------------------------------------------------------------------------------------------------------------------------------------------------------------------------------------------------------------------------------|----|----|------------------------|------------------|
| CBE—Life Sciences Education | 2016 | Brancaccio-Taras, L., Pape-Lindstrom, P., Peteroy-Kelly, M., Aguirre, K., Awong-Taylor, J., Balsler, T., ... & Zhao, J. (2016). The PULSE Vision & Change Rubrics, Version 1.0: A valid and equitable tool to measure transformation of life sciences departments at all institution types. <i>CBE—Life Sciences Education</i> , 15(4), ar60. | 16 | 2  | Curricula and Teaching | Research Article |
| CBE—Life Sciences Education | 2016 | Brickman, P., Gormally, C., & Martella, A. M. (2016). Making the grade: Using instructional feedback and evaluation to inspire evidence-based teaching. <i>CBE—Life Sciences Education</i> , 15(4), ar75.                                                                                                                                     | 3  | 0  | Curricula and Teaching | Research Article |
| CBE—Life Sciences Education | 2017 | Bissonnette, S. A., Combs, E. D., Nagami, P. H., Byers, V., Fernandez, J., Le, D., ... & Tanner, K. D. (2017). Using the biology card sorting task to measure changes in conceptual expertise during postsecondary biology education. <i>CBE—Life Sciences Education</i> , 16(1), ar14.                                                       | 10 | 1  | Curricula and Teaching | Research Article |
| CBE—Life Sciences Education | 2017 | Schinske, J. N., Balke, V. L., Bangera, M. G., Bonney, K. M., Brownell, S. E., Carter, R. S., ... & Corwin, L. A. (2017). Broadening participation in biology education research: Engaging community college students and faculty.                                                                                                            | 23 | 13 | Equity and Diversity   | Research Article |
| CBE—Life Sciences Education | 2017 | Ballen, C. J., Blum, J. E., Brownell, S., Hebert, S., Hewlett, J., Klein, J. R., ... & Cotner, S. (2017). A call to develop course-based undergraduate research experiences (CUREs) for nonmajors courses.                                                                                                                                    | 12 | 1  | Equity and Diversity   | Essay            |
| CBE—Life Sciences Education | 2017 | Martinková, P., Drabinová, A., Liaw, Y. L., Sanders, E. A., McFarland, J. L., & Price, R. M. (2017). Checking equity: Why differential item functioning analysis should be a routine part of developing conceptual assessments. <i>CBE—Life Sciences Education</i> , 16(2), rm2.                                                              | 6  | 1  | Equity and Diversity   | Research Article |
| CBE—Life Sciences Education | 2017 | McFarland, J. L., Price, R. M., Wenderoth, M. P., Martinková, P., Cliff, W., Michael, J., ... & Wright, A. (2017). Development and validation of the homeostasis                                                                                                                                                                              | 8  | 1  | Curricula and Teaching | Research Article |

|                             |      |                                                                                                                                                                                                                                                                                                                         |    |   |                        |                  |
|-----------------------------|------|-------------------------------------------------------------------------------------------------------------------------------------------------------------------------------------------------------------------------------------------------------------------------------------------------------------------------|----|---|------------------------|------------------|
|                             |      | concept inventory. <i>CBE—Life Sciences Education</i> , 16(2), ar35.                                                                                                                                                                                                                                                    |    |   |                        |                  |
| CBE—Life Sciences Education | 2017 | Andrews, S. E., Runyon, C., & Aikens, M. L. (2017). The math–biology values instrument: Development of a tool to measure life science majors’ task values of using math in the context of biology. <i>CBE—Life Sciences Education</i> , 16(3), ar45.                                                                    | 3  | 0 | Curricula and Teaching | Research Article |
| CBE—Life Sciences Education | 2017 | Ashley, M., Cooper, K. M., Cala, J. M., & Brownell, S. E. (2017). Building better bridges into STEM: A synthesis of 25 years of literature on STEM summer bridge programs. <i>CBE—Life Sciences Education</i> , 16(4), es3.                                                                                             | 4  | 0 | Curricula and Teaching | Review           |
| CBE—Life Sciences Education | 2018 | Schnoes, A. M., Caliendo, A., Morand, J., Dillinger, T., Naffziger-Hirsch, M., Moses, B., ... & O’Brien, T. C. (2018). Internship experiences contribute to confident career decision making for doctoral students in the life sciences. <i>CBE—Life Sciences Education</i> , 17(1), ar16.                              | 11 | 1 | Curricula and Teaching | Research Article |
| CBE—Life Sciences Education | 2018 | Pape-Lindstrom, P., Eddy, S., & Freeman, S. (2018). Reading quizzes improve exam scores for community college students. <i>CBE—Life Sciences Education</i> , 17(2), ar21.                                                                                                                                               | 3  | 1 | Curricula and Teaching | Research Article |
| CBE—Life Sciences Education | 2018 | Corwin, L. A., Runyon, C. R., Ghanem, E., Sandy, M., Clark, G., Palmer, G. C., ... & Dolan, E. L. (2018). Effects of discovery, iteration, and collaboration in laboratory courses on undergraduates’ research career intentions fully mediated by student ownership. <i>CBE—Life Sciences Education</i> , 17(2), ar20. | 9  | 0 | Curricula and Teaching | Research Article |
| CBE—Life Sciences Education | 2018 | Summers, M. M., Couch, B. A., Knight, J. K., Brownell, S. E., Crowe, A. J., Semsar, K., ... & Smith, M. K. (2018). EcoEvo-MAPS: An ecology and evolution assessment for introductory through advanced undergraduates. <i>CBE—Life Sciences Education</i> , 17(2), ar18.                                                 | 8  | 0 | Curricula and Teaching | Research Article |

|                             |      |                                                                                                                                                                                                                                                                                                                            |    |   |                        |                  |
|-----------------------------|------|----------------------------------------------------------------------------------------------------------------------------------------------------------------------------------------------------------------------------------------------------------------------------------------------------------------------------|----|---|------------------------|------------------|
| CBE—Life Sciences Education | 2018 | Martinez, L. R., Boucaud, D. W., Casadevall, A., & August, A. (2018). Factors contributing to the success of NIH-designated underrepresented minorities in academic and nonacademic research positions. <i>CBE—Life Sciences Education</i> , 17(2), ar32.                                                                  | 4  | 0 | Equity and Diversity   | Research Article |
| CBE—Life Sciences Education | 2018 | Hewlett, J. A. (2018). Broadening participation in undergraduate research experiences (UREs): The expanding role of the community college. <i>CBE—Life Sciences Education</i> , 17(3), es9.                                                                                                                                | 1  | 1 | Equity and Diversity   | Essay            |
| CBE—Life Sciences Education | 2018 | Thompson, C., Sanchez, J., Smith, M., Costello, J., Madabushi, A., Schuh-Nuhfer, N., ... & Rivers, D. (2018). Improving undergraduate life science education for the biosciences workforce: overcoming the disconnect between educators and industry. <i>CBE—Life Sciences Education</i> , 17(3), es12.                    | 11 | 3 | Degrees and Transfer   | Research Article |
| CBE—Life Sciences Education | 2018 | Kerr, J. Q., Hess, D. J., Smith, C. M., & Hadfield, M. G. (2018). Recognizing and reducing barriers to science and math education and STEM careers for Native Hawaiians and Pacific Islanders. <i>CBE—Life Sciences Education</i> , 17(4), mr1.                                                                            | 4  | 2 | Equity and Diversity   | Essay            |
| CBE—Life Sciences Education | 2018 | Hanauer, D. I., Nicholes, J., Liao, F. Y., Beasley, A., & Henter, H. (2018). Short-term research experience (SRE) in the traditional lab: Qualitative and quantitative data on outcomes. <i>CBE—Life Sciences Education</i> , 17(4), ar64.                                                                                 | 5  | 0 | Curricula and Teaching | Research Article |
| CBE—Life Sciences Education | 2018 | Hester, S. D., Nadler, M., Katcher, J., Elfring, L. K., Dykstra, E., Rezende, L. F., & Bolger, M. S. (2018). Authentic Inquiry through Modeling in Biology (AIM-Bio): An introductory laboratory curriculum that increases undergraduates' scientific agency and skills. <i>CBE—Life Sciences Education</i> , 17(4), ar63. | 7  | 1 | Curricula and Teaching | Research Article |

|                             |      |                                                                                                                                                                                                                                                                                                               |    |   |                        |                  |
|-----------------------------|------|---------------------------------------------------------------------------------------------------------------------------------------------------------------------------------------------------------------------------------------------------------------------------------------------------------------|----|---|------------------------|------------------|
| CBE—Life Sciences Education | 2018 | Thompson, J. J., & Jensen-Ryan, D. (2018). Becoming a “science person”: Faculty recognition and the development of cultural capital in the context of undergraduate biology research. <i>CBE—Life Sciences Education</i> , 17(4), ar62.                                                                       | 2  | 0 | Equity and Diversity   | Research Article |
| CBE—Life Sciences Education | 2019 | Couch, B. A., Wright, C. D., Freeman, S., Knight, J. K., Semsar, K., Smith, M. K., ... & Brownell, S. E. (2019). GenBio-MAPS: A programmatic assessment to measure student understanding of vision and change core concepts across general biology programs. <i>CBE—Life Sciences Education</i> , 18(1), ar1. | 10 | 0 | Curricula and Teaching | Research Article |
| CBE—Life Sciences Education | 2019 | Blumer, L. S., & Beck, C. W. (2019). Laboratory courses with guided-inquiry modules improve scientific reasoning and experimental design skills for the least-prepared undergraduate students. <i>CBE—Life Sciences Education</i> , 18(1), ar2.                                                               | 2  | 0 | Curricula and Teaching | Research Article |
| CBE—Life Sciences Education | 2019 | Diaz-Martinez, L. A., Fisher, G. R., Esparza, D., Bhatt, J. M., D’Arcy, C. E., Apodaca, J., ... & Olimpo, J. T. (2019). Recommendations for effective integration of ethics and responsible conduct of research (E/RCR) education into course-based undergraduate research experiences: A meeting report.     | 18 | 1 | Curricula and Teaching | Essay            |
| CBE—Life Sciences Education | 2019 | Nerio, R., Webber, A., MacLachlan, E., Lopatto, D., & Caplan, A. J. (2019). One-year research experience for associate’s degree students impacts graduation, STEM retention, and transfer patterns. <i>CBE—Life Sciences Education</i> , 18(2), ar25.                                                         | 5  | 0 | Degrees and Transfer   | Research Article |
| CBE—Life Sciences Education | 2019 | Vander Waal Mills, K. E., Gucinski, M., & Vander Waal, K. (2019). Implementation of open textbooks in community and technical college biology courses: The good, the bad, and the data. <i>CBE—Life Sciences Education</i> , 18(3), ar44.                                                                     | 3  | 2 | Curricula and Teaching | Research Article |

|                             |      |                                                                                                                                                                                                                                                                                                |    |    |                        |                  |
|-----------------------------|------|------------------------------------------------------------------------------------------------------------------------------------------------------------------------------------------------------------------------------------------------------------------------------------------------|----|----|------------------------|------------------|
| CBE—Life Sciences Education | 2019 | Harrison, C. D., Nguyen, T. A., Seidel, S. B., Escobedo, A. M., Hartman, C., Lam, K., ... & Tanner, K. D. (2019). Investigating instructor talk in novel contexts: Widespread use, unexpected categories, and an emergent sampling strategy. <i>CBE—Life Sciences Education</i> , 18(3), ar47. | 77 | 22 | Curricula and Teaching | Research Article |
| CBE—Life Sciences Education | 2019 | Corwin, L. A., Kiser, S., LoRe, S. M., Miller, J. M., & Aikens, M. L. (2019). Community college instructors' perceptions of constraints and affordances related to teaching quantitative biology skills and concepts. <i>CBE—Life Sciences Education</i> , 18(4), ar64.                        | 5  | 2  | Curricula and Teaching | Research Article |
| CBE—Life Sciences Education | 2020 | Dolan, E. L., Borrero, M., Callis-Duehl, K., Musgrove, M. M. C., de Lima, J., Ero-Tolliver, I., ... & Suarez, N. A. (2020). Undergraduate biology education research Gordon research conference: A meeting report. <i>CBE—Life Sciences Education</i> , 19(2), mr1.                            | 22 | 1  | Curricula and Teaching | Research Article |
| CBE—Life Sciences Education | 2020 | Branchaw, J. L., Pape-Lindstrom, P. A., Tanner, K. D., Bissonnette, S. A., Cary, T. L., Couch, B. A., ... & Brownell, S. E. (2020). Resources for teaching and assessing the vision and change biology core concepts. <i>CBE—Life Sciences Education</i> , 19(2), es1.                         | 15 | 1  | Curricula and Teaching | Essay            |
| CBE—Life Sciences Education | 2020 | Petersen, C. I., Baepler, P., Beitz, A., Ching, P., Gorman, K. S., Neudauer, C. L., ... & Wingert, D. (2020). The tyranny of content: "Content coverage" as a barrier to evidence-based teaching approaches and ways to overcome it. <i>CBE—Life Sciences Education</i> , 19(2), ar17.         | 9  | 1  | Curricula and Teaching | Essay            |
| CBE—Life Sciences Education | 2020 | Clement, L., Dorman, J. B., & McGee, R. (2020). The academic career readiness assessment: clarifying hiring and training expectations for future biomedical life sciences faculty. <i>CBE—Life Sciences Education</i> , 19(2), ar22.                                                           | 3  | 0  | Curricula and Teaching | Research Article |



|                             |      |                                                                                                                                                                                                                                                                                                  |    |   |                        |                  |
|-----------------------------|------|--------------------------------------------------------------------------------------------------------------------------------------------------------------------------------------------------------------------------------------------------------------------------------------------------|----|---|------------------------|------------------|
| CBE—Life Sciences Education | 2020 | Genné-Bacon, E. A., Wilks, J., & Bascom-Slack, C. (2020). Uncovering factors influencing instructors' decision process when considering implementation of a course-based research experience. <i>CBE—Life Sciences Education</i> , 19(2), ar13.                                                  | 3  | 0 | Curricula and Teaching | Research Article |
| CBE—Life Sciences Education | 2020 | Downing, V. R., Cooper, K. M., Cala, J. M., Gin, L. E., & Brownell, S. E. (2020). Fear of negative evaluation and student anxiety in community college active-learning science courses. <i>CBE—Life Sciences Education</i> , 19(2), ar20.                                                        | 5  | 1 | Equity and Diversity   | Research Article |
| CBE—Life Sciences Education | 2020 | Scott, E. E., Wenderoth, M. P., & Doherty, J. H. (2020). Design-based research: a methodology to extend and enrich biology education research. <i>CBE—Life Sciences Education</i> , 19(2), es11.                                                                                                 | 3  | 0 | Curricula and Teaching | Essay            |
| CBE—Life Sciences Education | 2020 | Cooper, K. M., Auerbach, A. J. J., Bader, J. D., Beadles-Bohling, A. S., Brashears, J. A., Cline, E., ... & Brownell, S. E. (2020). Fourteen recommendations to create a more inclusive environment for LGBTQ+ individuals in academic biology. <i>CBE—Life Sciences Education</i> , 19(3), es6. | 26 | 1 | Equity and Diversity   | Essay            |
| CBE—Life Sciences Education | 2020 | Thompson, S. K., Hebert, S., Berk, S., Brunelli, R., Creech, C., Drake, A. G., ... & Ballen, C. J. (2020). A call for data-driven networks to address equity in the context of undergraduate biology. <i>CBE—Life Sciences Education</i> , 19(4), mr2.                                           | 15 | 1 | Equity and Diversity   | Research Article |
| CBE—Life Sciences Education | 2020 | Jensen-Ryan, D., Murren, C. J., Rutter, M. T., & Thompson, J. J. (2020). Advancing science while training undergraduates: recommendations from a collaborative biology research network. <i>CBE—Life Sciences Education</i> , 19(4), es13.                                                       | 4  | 1 | Curricula and Teaching | Essay            |
| CBE—Life Sciences Education | 2020 | Clemmons, A. W., Timbrook, J., Herron, J. C., & Crowe, A. J. (2020). BioSkills Guide: Development and national validation of a tool for interpreting the Vision and Change                                                                                                                       | 4  | 0 | Curricula and Teaching | Research Article |

|                                     |      |                                                                                                                                                                                                                                               |   |   |                        |                  |
|-------------------------------------|------|-----------------------------------------------------------------------------------------------------------------------------------------------------------------------------------------------------------------------------------------------|---|---|------------------------|------------------|
|                                     |      | core competencies. <i>CBE—Life Sciences Education</i> , 19(4), ar53.                                                                                                                                                                          |   |   |                        |                  |
| CBE—Life Sciences Education         | 2020 | Driessen, E. P., Knight, J. K., Smith, M. K., & Ballen, C. J. (2020). Demystifying the meaning of active learning in postsecondary biology education. <i>CBE—Life Sciences Education</i> , 19(4), ar52.                                       | 4 | 0 | Curricula and Teaching | Research Article |
| Journal of College Science Teaching | 2016 | Gonzalez, B. (2016) Time for Action: Vision and Change Implementation in an Online Biology Course at a Community College. <i>Journal of College Science Teaching</i> , vol. 45, no. 4                                                         | 1 | 1 | Curricula and Teaching | Research Article |
| Journal of College Science Teaching | 2016 | Tanski, A., Bobick, S., Mosley-Turner, K., & Garofalo, G. (2016) The Impact of the Clinical Social Worker in a Community College Biotech Program: A Cohort Study. <i>Journal of College Science Teaching</i> , vol. 45, no. 6                 | 4 | 4 | Equity and Diversity   | Research Article |
| Journal of College Science Teaching | 2016 | Herried, C. F., Prud'homme-Genereux, A., Schiller, N. A., Herreid, K. F., & Wright, C. (2016). Case Study: What Makes a Good Case, Revisited: The Survey Monkey Tells All. <i>Journal of College Science Teaching</i> , 46(1).                | 5 | 0 | Curricula and Teaching | Research Article |
| Journal of College Science Teaching | 2016 | Ellerton, S., Carmona, N., & Tsimounis, A. (2016) "Increasing science knowledge among high-risk student populations through a community college honors/service-learning program." <i>Journal of College Science Teaching</i> , vol. 46, no. 2 | 3 | 3 | Curricula and Teaching | Research Article |
| Journal of College Science Teaching | 2017 | Keller, C. (2017) Using formative assessment to improve microscope skills among Urban community college General Biology I lab students. <i>Journal of College Science Teaching</i> , vol. 46, no. 3                                           | 1 | 1 | Curricula and Teaching | Research Article |
| Journal of College Science Teaching | 2017 | Tuthill, M., & Berestecky, J. (2017) Integrating undergraduate research at two-year colleges. <i>Journal of College Science Teaching</i> , vol. 46, no. 4                                                                                     | 2 | 2 | Curricula and Teaching | Research Article |

|                                     |      |                                                                                                                                                                                                                                                                            |   |   |                        |                  |
|-------------------------------------|------|----------------------------------------------------------------------------------------------------------------------------------------------------------------------------------------------------------------------------------------------------------------------------|---|---|------------------------|------------------|
| Journal of College Science Teaching | 2017 | Marrero, M., Riccio, J., Ben-Jacob, M., Canger, A., & Maliti, C. (2017) A Crash Course in Undergraduate Research. Journal of College Science Teaching, vol. 46, no. 5                                                                                                      | 5 | 1 | Equity and Diversity   | Teaching Tip     |
| Journal of College Science Teaching | 2017 | Bennett, S., & Wenk Gotwals, A. (2017) Construction with scaffolds: helping community college students build explanations. Journal of College Science Teaching, vol. 46, no. 6                                                                                             | 2 | 0 | Curricula and Teaching | Research Article |
| Journal of College Science Teaching | 2017 | Lysne, S., & Miller, B. (2017) A comparison of long-term knowledge retention between two teaching approaches. Journal of College Science Teaching, vol. 46, no. 6                                                                                                          | 2 | 1 | Curricula and Teaching | Research Article |
| Journal of College Science Teaching | 2017 | Tawde, M., Boccio, D., & Kolack, K. (2017) Resolving misconceptions through student reflections. Journal of College Science Teaching, vol. 47, no. 1                                                                                                                       | 3 | 3 | Curricula and Teaching | Research Article |
| Journal of College Science Teaching | 2017 | McLaughlin, J., Favre, D., Weinstein, S., & Goedhart, C. (2017) The impact of a four-step laboratory pedagogical framework on biology students' perceptions of laboratory skills, knowledge, and interest in research. Journal of College Science Teaching, vol. 47, no. 1 | 4 | 1 | Curricula and Teaching | Research Article |
| Journal of College Science Teaching | 2018 | Baze, C. & Gray, R. (2018) Modeling Tiktaalik: Using a Model-Based Inquiry Approach to Engage Community College Students in the Practices of Science During an Evolution Unit. Journal of College Science Teaching, vol. 47, no. 4                                         | 2 | 1 | Curricula and Teaching | Research Article |
| Journal of College Science Teaching | 2018 | Page, R., Espinosa, J., Mares, C., Del Pilar, J., & Shelton, GR. (2018) Point of View: The Curvy Road to Student Success in Underserved Populations. Journal of College Science Teaching, vol. 47, no. 5                                                                   | 5 | 1 | Curricula and Teaching | Essay            |

|                                     |      |                                                                                                                                                                                                                                                                                  |   |   |                        |                  |
|-------------------------------------|------|----------------------------------------------------------------------------------------------------------------------------------------------------------------------------------------------------------------------------------------------------------------------------------|---|---|------------------------|------------------|
| Journal of College Science Teaching | 2018 | Pergams, O., Jake-Matthews, C., & Mohanty, L. (2018) A Combined Read-Aloud Think-Aloud Strategy Improves Student Learning Experiences in College-Level Biology Courses. <i>Journal of College Science Teaching</i> , vol. 47, no. 5                                              | 3 | 2 | Curricula and Teaching | Research Article |
| Journal of College Science Teaching | 2018 | McLaughlin, S., & Petersen, J. (2018) Hands-On Mini-Case Studies Promote Integration of Microbiological Concepts. <i>Journal of College Science Teaching</i> , vol. 47, no. 6                                                                                                    | 2 | 2 | Curricula and Teaching | Case Study       |
| Journal of College Science Teaching | 2018 | Keller, C., Hendrix, T., Xu, N., Porter-Morgan, H., & Brashears, A. (2018) A Foundation for STEM Success: A Simple and Successful Microscope Intervention in a General Biology Course at an Urban Community College. <i>Journal of College Science Teaching</i> , vol. 48, no. 1 | 5 | 5 | Curricula and Teaching | Research Article |
| Journal of College Science Teaching | 2018 | Mraz-Craig, J., Daniel, K., Bucklin, C., Mishra, C., Ali, L., & Clase, K. (2018) Student Identities in Authentic Course-Based Undergraduate Research Experience. <i>Journal of College Science Teaching</i> , vol. 48, no. 1                                                     | 6 | 1 | Equity and Diversity   | Research Article |
| Journal of College Science Teaching | 2018 | Reinbold, S. (2018) Critical Thinking Assessment of Students in Nonmajors Biology Classes with Corn or Fly Genetics Laboratory Studies. <i>Journal of College Science Teaching</i> , vol. 48, no. 2                                                                              | 1 | 1 | Curricula and Teaching | Research Article |
| Journal of College Science Teaching | 2019 | Tamari, F., & Ho, I. S. (2019). Guided Inquiry-Based Activities Positively Impact Learning in Community College Courses. <i>Journal of College Science Teaching</i> , vol. 48, no. 4                                                                                             | 2 | 2 | Curricula and Teaching | Research Article |
| Journal of College Science Teaching | 2019 | De Leone, C., Price, E., Sabella, M., & Van Duzor, A. (2019) Developing and Sustaining Faculty-Driven, Curriculum-Centered Partnerships Between Two-Year Colleges and Four-Year Institutions. <i>Journal of College Science Teaching</i> , vol. 48, no. 6                        | 4 | 0 | Degrees and Transfer   | Teaching Tip     |

|                                               |      |                                                                                                                                                                                                                                                                                          |   |   |                        |                  |
|-----------------------------------------------|------|------------------------------------------------------------------------------------------------------------------------------------------------------------------------------------------------------------------------------------------------------------------------------------------|---|---|------------------------|------------------|
| Journal of College Science Teaching           | 2019 | Nenortas, A., & Fields, L. (2019). Editorial: Two-Year Colleges (TYCs) are Essential in Science Education Research and TYC faculty and Students Should Get Involved. <i>Journal of College Science Teaching</i> , vol. 49, no. 1                                                         | 2 | 2 | Equity and Diversity   | Editorial        |
| Journal of College Science Teaching           | 2020 | Farshad, T., Dawson, M., & Shun Ho, I. (2020). Nonideal Placement of Nonmajors in Biology Major and Allied Health Courses Results in Poor Performance and Higher Attrition Rates. <i>Journal of College Science Teaching</i> , vol 49, no 4                                              | 3 | 3 | Curricula and Teaching | Research Article |
| Journal of College Science Teaching           | 2020 | Scott, F., Pape-Lindstrom, P., Casper, A., & Eddy, S. (2020). Community College Students Rise to the Challenge-- Meeting the Time Demands of Highly Structured Courses. <i>Journal of College Science Teaching</i> , vol 49, no 5                                                        | 4 | 1 | Equity and Diversity   | Research Article |
| Journal of College Science Teaching           | 2020 | Long, M., Cottrell-Yongye, A., & Huynh, T. (2020). Backward Redesign of a Nonmajors' Biology Course at a Two-Year Technical College. <i>Journal of College Science Teaching</i> , vol 49, no 6                                                                                           | 3 | 2 | Curricula and Teaching | Research Article |
| Journal of College Science Teaching           | 2020 | Fisher, R., Cole, D., Oh, Y., & Vemu, S. (2020). Identifying Differences in Learning Strategies by Demographics and Course Grade in a Community College Context. <i>Journal of College Science Teaching</i> , vol 50, no1                                                                | 4 | 2 | Curricula and Teaching | Research Article |
| Journal of Microbiology and Biology Education | 2016 | Van Vliet, K., & Moore, C. (2016). Citizen science initiatives: Engaging the public and demystifying science. <i>Journal of Microbiology &amp; Biology Education</i> , 17(1), 13–16. <a href="https://doi.org/10.1128/jmbe.v17i1.1019">https://doi.org/10.1128/jmbe.v17i1.1019</a>       | 2 | 2 | Curricula and Teaching | Teaching Tip     |
| Journal of Microbiology and Biology Education | 2016 | Scheifele, L. Z., & Burkett, T. (2016). The first three years of a community lab: Lessons learned and ways forward. <i>Journal of Microbiology &amp; Biology Education</i> , 17(1), 81–85. <a href="https://doi.org/10.1128/jmbe.v17i1.1013">https://doi.org/10.1128/jmbe.v17i1.1013</a> | 2 | 1 | Curricula and Teaching | Essay            |
| Journal of Microbiology                       | 2016 | Kridelbaugh, Donna M. “The Use of Online Citizen-Science Projects to Provide Experiential Learning Opportunities for Nonmajor Science Students.” <i>Journal of Microbiology &amp;</i>                                                                                                    | 1 | 1 | Curricula and Teaching | Teaching Tip     |

|                                               |      |                                                                                                                                                                                                                                                                                                                                                                                          |   |   |                        |                  |
|-----------------------------------------------|------|------------------------------------------------------------------------------------------------------------------------------------------------------------------------------------------------------------------------------------------------------------------------------------------------------------------------------------------------------------------------------------------|---|---|------------------------|------------------|
| and Biology Education                         |      | Biology Education, vol. 17, no. 1, 1 Mar. 2016, pp. 105–106., <a href="https://doi.org/10.1128/jmbe.v17i1.1022">https://doi.org/10.1128/jmbe.v17i1.1022</a> .                                                                                                                                                                                                                            |   |   |                        |                  |
| Journal of Microbiology and Biology Education | 2016 | Brancaccio-Taras, L., Gull, K. A., & Ratti, C. (2016). The science teaching fellows program: A model for online faculty development of early career scientists interested in teaching. <i>Journal of Microbiology &amp; Biology Education</i> , 17(3), 333–338. <a href="https://doi.org/10.1128/jmbe.v17i3.1243">https://doi.org/10.1128/jmbe.v17i3.1243</a>                            | 3 | 1 | Curricula and Teaching | Research Article |
| Journal of Microbiology and Biology Education | 2016 | Biel, Rachel, and Cynthia J. Brame. “Traditional versus Online Biology Courses: Connecting Course Design and Student Learning in an Online Setting.” <i>Journal of Microbiology &amp; Biology Education</i> , vol. 17, no. 3, 2 Dec. 2016, pp. 417–422., <a href="https://doi.org/10.1128/jmbe.v17i3.1157">https://doi.org/10.1128/jmbe.v17i3.1157</a> .                                 | 2 | 0 | Curricula and Teaching | Research Article |
| Journal of Microbiology and Biology Education | 2017 | Petersen, Joan, and Susan K. McLaughlin. “Design and Revision of an Open-Educational Resource Microbiology Lab Manual Using Student Feedback.” <i>Journal of Microbiology &amp; Biology Education</i> , vol. 18, no. 2, 1 Sept. 2017, <a href="https://doi.org/10.1128/jmbe.v18i2.1302">https://doi.org/10.1128/jmbe.v18i2.1302</a> .                                                    | 2 | 2 | Curricula and Teaching | Research Article |
| Journal of Microbiology and Biology Education | 2017 | Axler-DiPerte, Grace L. “Modeling and Visualizing Bacterial Colony Purification without the Use of Bacteria or Laboratory Equipment.” <i>Journal of Microbiology &amp; Biology Education</i> , vol. 18, no. 2, 11 Aug. 2017, <a href="https://doi.org/10.1128/jmbe.v18i2.1308">https://doi.org/10.1128/jmbe.v18i2.1308</a> .                                                             | 1 | 1 | Curricula and Teaching | Teaching Tip     |
| Journal of Microbiology and Biology Education | 2017 | Seitz, H. M., Horak, R. E., Howard, M. W., Kluckhohn Jones, L. W., Muth, T., Parker, C., Rediske, A. P., & Whitehurst, M. M. (2017). Development and validation of the Microbiology for Health Sciences Concept Inventory. <i>Journal of Microbiology &amp; Biology Education</i> , 18(3). <a href="https://doi.org/10.1128/jmbe.v18i3.1322">https://doi.org/10.1128/jmbe.v18i3.1322</a> | 8 | 3 | Curricula and Teaching | Research Article |

|                                               |      |                                                                                                                                                                                                                                                                                                                                                                                                                                                                     |   |   |                        |                  |
|-----------------------------------------------|------|---------------------------------------------------------------------------------------------------------------------------------------------------------------------------------------------------------------------------------------------------------------------------------------------------------------------------------------------------------------------------------------------------------------------------------------------------------------------|---|---|------------------------|------------------|
| Journal of Microbiology and Biology Education | 2017 | Hoskins, Sally G., et al. "Create Two-Year/Four-Year Faculty Workshops: A Focus on Practice, Reflection, and Novel Curricular Design Leads to Diverse Gains for Faculty at Two-Year and Four-Year Institutions." <i>Journal of Microbiology &amp; Biology Education</i> , vol. 18, no. 3, 15 Dec. 2017, <a href="https://doi.org/10.1128/jmbe.v18i3.1365">https://doi.org/10.1128/jmbe.v18i3.1365</a> .                                                             | 3 | 0 | Curricula and Teaching | Research Article |
| Journal of Microbiology and Biology Education | 2017 | Shortlidge, E. E., Bangera, G., & Brownell, S. E. (2017). Each to their own cure: Faculty who teach course-based undergraduate research experiences report why you too should teach a cure. <i>Journal of Microbiology &amp; Biology Education</i> , 18(2). <a href="https://doi.org/10.1128/jmbe.v18i2.1260">https://doi.org/10.1128/jmbe.v18i2.1260</a>                                                                                                           | 3 | 1 | Curricula and Teaching | Research Article |
| Journal of Microbiology and Biology Education | 2018 | Norman-McKay, Lourdes, and The ASM MINAH Undergraduate Curriculum Guidelines Committee. "Microbiology in Nursing and Allied Health (MINAH) Undergraduate Curriculum Guidelines: A Call to Retain Microbiology Lecture and Laboratory Courses in Nursing and Allied Health Programs." <i>Journal of Microbiology &amp; Biology Education</i> , vol. 19, no. 1, 2018, <a href="https://doi.org/10.1128/jmbe.v19i1.1524">https://doi.org/10.1128/jmbe.v19i1.1524</a> . | 2 | 2 | Curricula and Teaching | Essay            |
| Journal of Microbiology and Biology Education | 2018 | Fillmer, Kornelia, et al. "Using Tobamoviruses for Phylogenetic Instruction in Undergraduate Biology Courses." <i>Journal of Microbiology &amp; Biology Education</i> , vol. 19, no. 2, 25 May 2018, <a href="https://doi.org/10.1128/jmbe.v19i2.1519">https://doi.org/10.1128/jmbe.v19i2.1519</a> .                                                                                                                                                                | 4 | 3 | Curricula and Teaching | Teaching Tip     |
| Journal of Microbiology and Biology Education | 2018 | Andrews, Sarah E., and Melissa L. Aikens. "Life Science Majors' Math-Biology Task Values Relate to Student Characteristics and Predict the Likelihood of Taking Quantitative Biology Courses." <i>Journal of Microbiology &amp; Biology Education</i> , vol. 19, no. 2, 31 July 2018, <a href="https://doi.org/10.1128/jmbe.v19i2.1589">https://doi.org/10.1128/jmbe.v19i2.1589</a> .                                                                               | 2 | 0 | Equity and Diversity   | Research Article |
| Journal of Microbiology                       | 2018 | Genné-Bacon, Elizabeth A., and Carol A. Bascom-Slack. "The Pare Project: A Short Course-Based Research Project for National Surveillance of Antibiotic-Resistant Microbes in                                                                                                                                                                                                                                                                                        | 2 | 0 | Curricula and Teaching | Teaching Tip     |

|                                               |      |                                                                                                                                                                                                                                                                                                                                                                                                                                                                                                                                                           |    |   |                        |                  |
|-----------------------------------------------|------|-----------------------------------------------------------------------------------------------------------------------------------------------------------------------------------------------------------------------------------------------------------------------------------------------------------------------------------------------------------------------------------------------------------------------------------------------------------------------------------------------------------------------------------------------------------|----|---|------------------------|------------------|
| and Biology Education                         |      | Environmental Samples.” Journal of Microbiology & Biology Education, vol. 19, no. 3, 31 Oct. 2018, <a href="https://doi.org/10.1128/jmbe.v19i3.1603">https://doi.org/10.1128/jmbe.v19i3.1603</a> .                                                                                                                                                                                                                                                                                                                                                        |    |   |                        |                  |
| Journal of Microbiology and Biology Education | 2018 | Kolokithas, A., & Calderón, O. (2018). A how-to guide on Bringing Undergraduate Research to community and Technical Colleges. Journal of Microbiology & Biology Education, 19(3). <a href="https://doi.org/10.1128/jmbe.v19i3.1653">https://doi.org/10.1128/jmbe.v19i3.1653</a>                                                                                                                                                                                                                                                                           | 2  | 2 | Curricula and Teaching | Teaching Tip     |
| Journal of Microbiology and Biology Education | 2019 | Mathur V, Arora GS, McWilliams M, Russell J, Rosenwald AG. (2019). The Genome Solver Project: Faculty Training and Student Performance Gains in Bioinformatics. J Microbiol Biol Educ. 20(1):20.1.4. <a href="https://doi.org/10.1128/jmbe.v20i1.1607">doi/10.1128/jmbe.v20i1.1607</a>                                                                                                                                                                                                                                                                    | 5  | 0 | Curricula and Teaching | Research Article |
| Journal of Microbiology and Biology Education | 2019 | Meléndez, J. (2019). Teaching microbiology by celebrating traditional foods and cultures from Morocco and Perú. Journal of Microbiology & Biology Education, 20(1). <a href="https://doi.org/10.1128/jmbe.v20i1.1685">https://doi.org/10.1128/jmbe.v20i1.1685</a>                                                                                                                                                                                                                                                                                         | 1  | 1 | Curricula and Teaching | Teaching Tip     |
| Journal of Microbiology and Biology Education | 2019 | Wolyniak, M. J., Austin, S., Bloodworth, L. F., Carter, D., Harrison, S. H., Hoage, T., Hollis-Brown, L., Jefferson, F., Krufka, A., Safadi-Chamberlin, F., Santisteban, M. S., Soneral, P., VanWinkle, B., & Challa, A. K. (2019). Integrating CRISPR-Cas9 technology into undergraduate courses: Perspectives from a National Science Foundation (NSF) workshop for Undergraduate Faculty, June 2018. Journal of Microbiology & Biology Education, 20(1). <a href="https://doi.org/10.1128/jmbe.v20i1.1702">https://doi.org/10.1128/jmbe.v20i1.1702</a> | 14 | 1 | Curricula and Teaching | Essay            |
| Journal of Microbiology and Biology Education | 2019 | Basta, Holly, and Deborah Catherine Cole. “Histology Personal Trainer: Identifying Tissue Types Using Critical Thinking and Metacognition Prompts.” Journal of Microbiology & Biology Education, vol. 20, no. 2, 30 Aug. 2019, <a href="https://doi.org/10.1128/jmbe.v20i2.1791">https://doi.org/10.1128/jmbe.v20i2.1791</a> .                                                                                                                                                                                                                            | 3  | 1 | Curricula and Teaching | Teaching Tip     |



|                                               |      |                                                                                                                                                                                                                                                                                                                                                                                    |   |   |                        |                  |
|-----------------------------------------------|------|------------------------------------------------------------------------------------------------------------------------------------------------------------------------------------------------------------------------------------------------------------------------------------------------------------------------------------------------------------------------------------|---|---|------------------------|------------------|
| Journal of Microbiology and Biology Education | 2019 | Beck, Christopher W., and Lawrence S. Blumer. "A Model for an Intensive Hands-on Faculty Development Workshop to Foster Change in Laboratory Teaching." <i>Journal of Microbiology &amp; Biology Education</i> , vol. 20, no. 3, 31 Oct. 2019, <a href="https://doi.org/10.1128/jmbe.v20i3.1799">https://doi.org/10.1128/jmbe.v20i3.1799</a> .                                     | 2 | 0 | Curricula and Teaching | Research Article |
| Journal of Microbiology and Biology Education | 2019 | Gonzalez, Kimberly A., et al. "Collaborative Mentoring for Retaining Secondary Biology Teachers." <i>Journal of Microbiology &amp; Biology Education</i> , vol. 20, no. 3, 31 Oct. 2019, <a href="https://doi.org/10.1128/jmbe.v20i3.1811">https://doi.org/10.1128/jmbe.v20i3.1811</a> .                                                                                           | 3 | 1 | Other                  | Teaching Tip     |
| Journal of Microbiology and Biology Education | 2019 | Chou, Ann F., et al. "Impact and Outcomes of the Oklahoma IDEA Network of Biomedical Research Excellence Summer Undergraduate Research Program." <i>Journal of Microbiology &amp; Biology Education</i> , vol. 20, no. 3, 31 Oct. 2019, <a href="https://doi.org/10.1128/jmbe.v20i3.1815">https://doi.org/10.1128/jmbe.v20i3.1815</a> .                                            | 3 | 0 | Curricula and Teaching | Research Article |
| Journal of Microbiology and Biology Education | 2019 | Byrd, Jeffrey J., et al. "Guidelines for Biosafety in Teaching Laboratories Version 2.0: A Revised and Updated Manual for 2019." <i>Journal of Microbiology &amp; Biology Education</i> , vol. 20, no. 3, 18 Aug. 2019, <a href="https://doi.org/10.1128/jmbe.v20i3.1975">https://doi.org/10.1128/jmbe.v20i3.1975</a> .                                                            | 5 | 1 | Curricula and Teaching | Teaching Tip     |
| Journal of Microbiology and Biology Education | 2020 | Moore, Michael E., et al. "Facilitating Long-Term Mentoring to Effectively Implement Active Learning Instruction: Formation of the Promoting Active Learning and Mentoring (PALM) Network." <i>Journal of Microbiology &amp; Biology Education</i> , vol. 21, no. 3, 12 Nov. 2020, <a href="https://doi.org/10.1128/jmbe.v21i3.2203">https://doi.org/10.1128/jmbe.v21i3.2203</a> . | 9 | 2 | Curricula and Teaching | Essay            |
| Journal of Microbiology and Biology Education | 2020 | Axler-DiPerte, Grace L., and Mary T. Ortiz. "What's Your Diagnosis? A Rapid Inquiry-Based Game to Differentiate and Review Medically Important Microbes." <i>Journal of Microbiology &amp; Biology Education</i> , vol. 21, no. 3, 12 Nov. 2020, <a href="https://doi.org/10.1128/jmbe.v21i3.2059">https://doi.org/10.1128/jmbe.v21i3.2059</a> .                                   | 2 | 2 | Curricula and Teaching | Teaching Tip     |

|                                               |      |                                                                                                                                                                                                                                                                                                                                                     |     |   |                        |                  |
|-----------------------------------------------|------|-----------------------------------------------------------------------------------------------------------------------------------------------------------------------------------------------------------------------------------------------------------------------------------------------------------------------------------------------------|-----|---|------------------------|------------------|
| Journal of Microbiology and Biology Education | 2020 | Clement, Laurence, et al. "The Supervisory Role of Life Science Research Faculty: The Missing Link to Diversifying the Academic Workforce?" Journal of Microbiology & Biology Education, vol. 21, no. 1, 10 Apr. 2020, <a href="https://doi.org/10.1128/jmbe.v21i1.1911">https://doi.org/10.1128/jmbe.v21i1.1911</a> .                              | 4   | 2 | Equity and Diversity   | Essay            |
| Journal of Microbiology and Biology Education | 2020 | Lopatto, David, et al. "Facilitating Growth through Frustration: Using Genomics Research in a Course-Based Undergraduate Research Experience." Journal of Microbiology & Biology Education, vol. 21, no. 1, 28 Feb. 2020, <a href="https://doi.org/10.1128/jmbe.v21i1.2005">https://doi.org/10.1128/jmbe.v21i1.2005</a> .                           | 103 | 6 | Curricula and Teaching | Research Article |
| Journal of Microbiology and Biology Education | 2020 | Smith-Keiling, Beverly L., et al. "Starting the Conversation: Initial Listening and Identity Approaches to Community Cultural Wellness." Journal of Microbiology & Biology Education, vol. 21, no. 1, 10 Apr. 2020, <a href="https://doi.org/10.1128/jmbe.v21i1.2073">https://doi.org/10.1128/jmbe.v21i1.2073</a> .                                 | 11  | 1 | Equity and Diversity   | Essay            |
| Journal of Microbiology and Biology Education | 2020 | Hood, Suzanne, et al. "Some Believe, Not All Achieve: The Role of Active Learning Practices in Anxiety and Academic Self-Efficacy in First-Generation College Students." Journal of Microbiology & Biology Education, vol. 21, no. 1, 10 Apr. 2020, <a href="https://doi.org/10.1128/jmbe.v21i1.2075">https://doi.org/10.1128/jmbe.v21i1.2075</a> . | 14  | 6 | Equity and Diversity   | Research Article |

| <b>Supplemental Table 3:<br/>Number of CC BER Publications in Each Paper Type<br/>Category Between 2016-2020</b> |                         |
|------------------------------------------------------------------------------------------------------------------|-------------------------|
| <b>Type of Paper</b>                                                                                             | <b>Number of Papers</b> |
| Research Article                                                                                                 | 93                      |
| Teaching Tip                                                                                                     | 20                      |
| Essay                                                                                                            | 26                      |
| Case Study                                                                                                       | 3                       |
| Review Article                                                                                                   | 1                       |
| Editorial                                                                                                        | 3                       |
| Letter to Editor                                                                                                 | 1                       |
| Total                                                                                                            | 147                     |

| <b>Supplemental Table 4:<br/>Number of CC BER Publications in Each Paper Topic<br/>Category Between 2016-2020</b> |                         |
|-------------------------------------------------------------------------------------------------------------------|-------------------------|
| <b>Paper Topic</b>                                                                                                | <b>Number of Papers</b> |
| Curricula and Teaching                                                                                            | 108                     |
| Degrees and Transfer                                                                                              | 10                      |
| Equity and Diversity                                                                                              | 22                      |
| Other                                                                                                             | 7                       |
| Total                                                                                                             | 147                     |
